# Supplementary material for: Structure characteristics, protective effect and mechanisms of ethanol-fractional polysaccharides from Dendrobium officinale on acute ethanol-induced gastritis
Source: Royal Society of Chemistry journal article supplement (doi:10.1039/d3fo05540j), 2024-01-01
Supplement: d3fo05540j1.pdf [file d3fo05540j1.pdf]

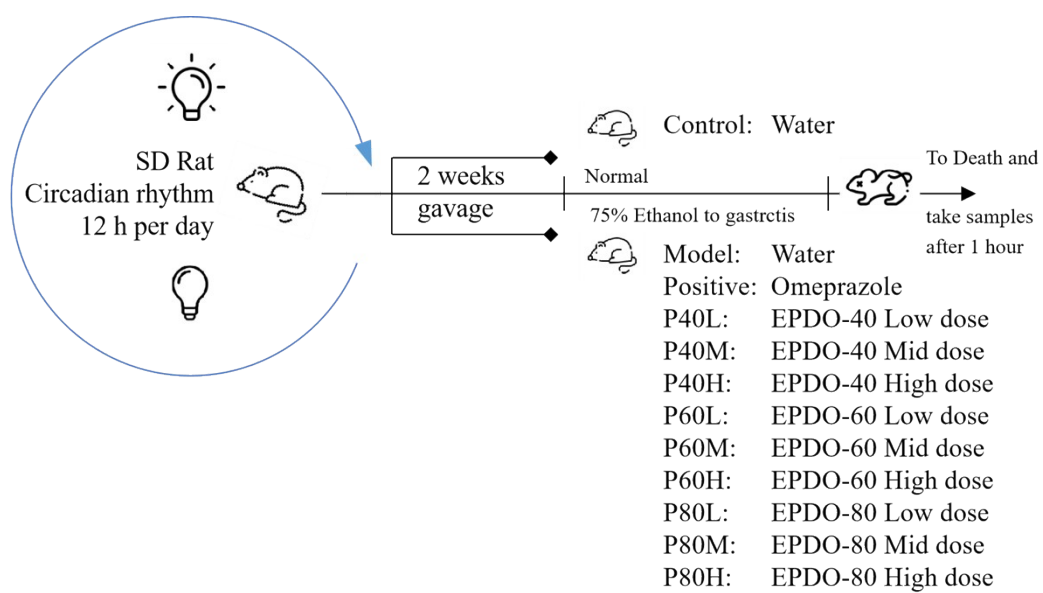

**Fig. S1 Rat gastritis model establishment process**

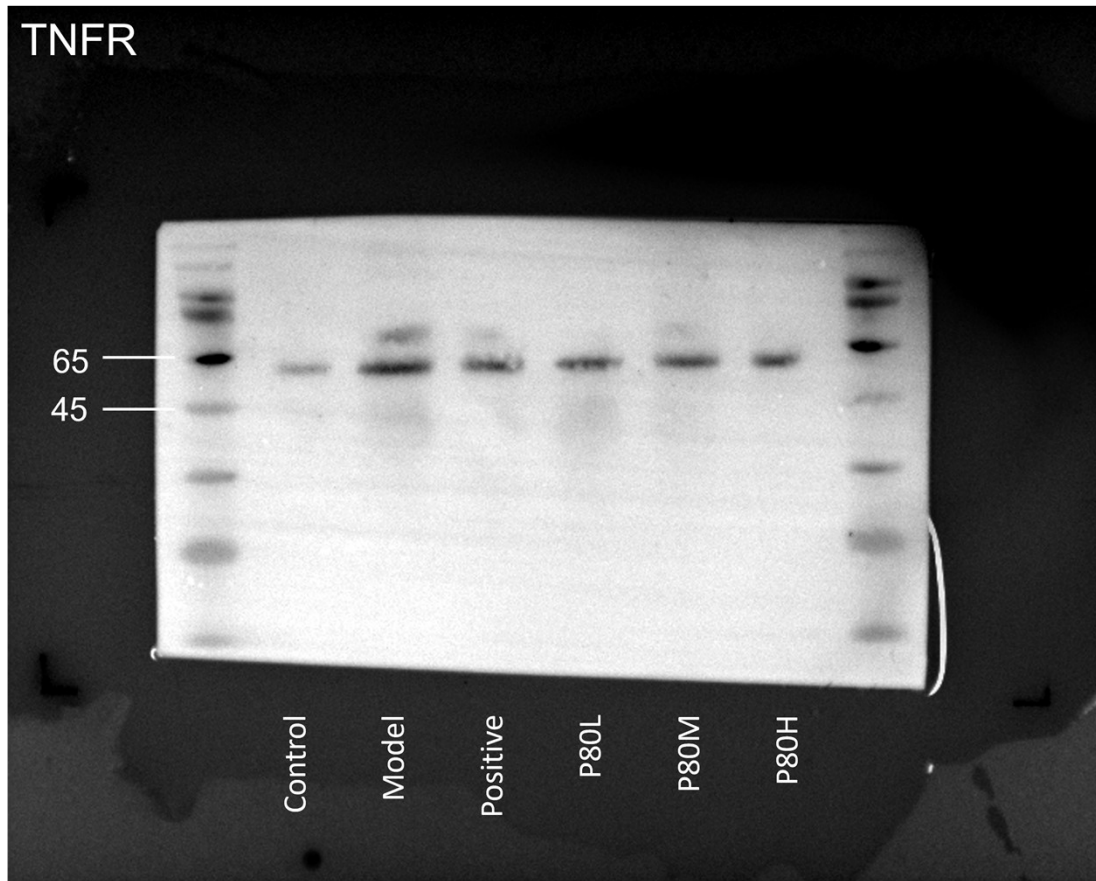

**Fig. S2** WB figure of TNFR (55 kDa)

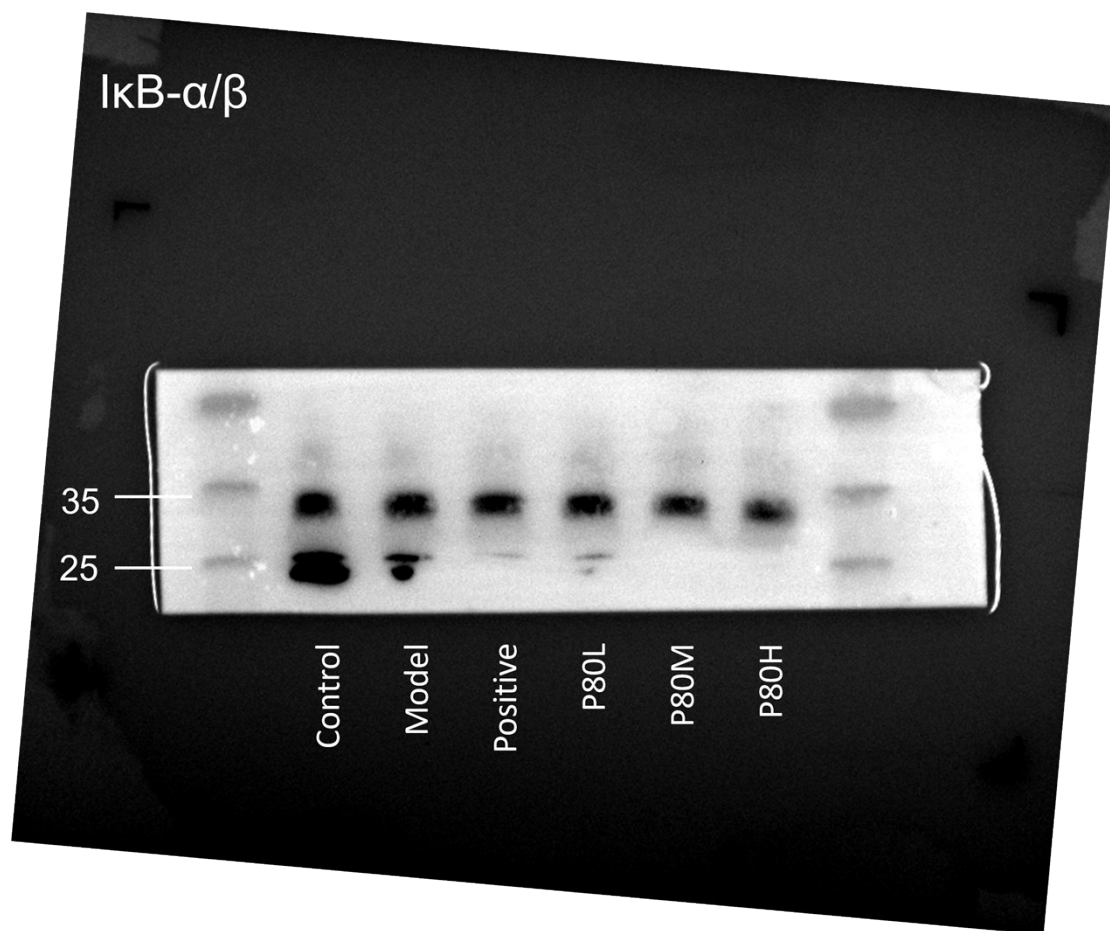

**Fig. S3** WB figure of IκB-α/β (34 kDa)

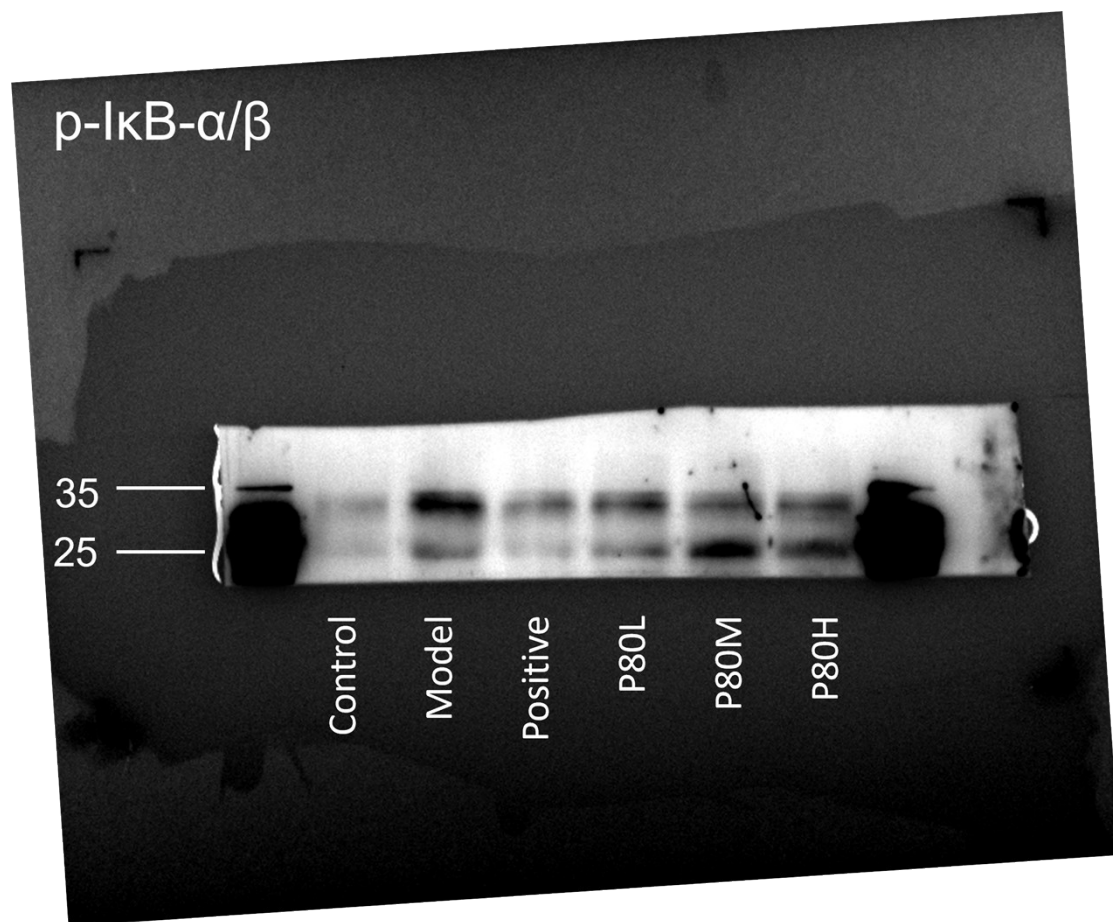

**Fig. S4** WB figure of p-IκB-α/β (34 kDa)

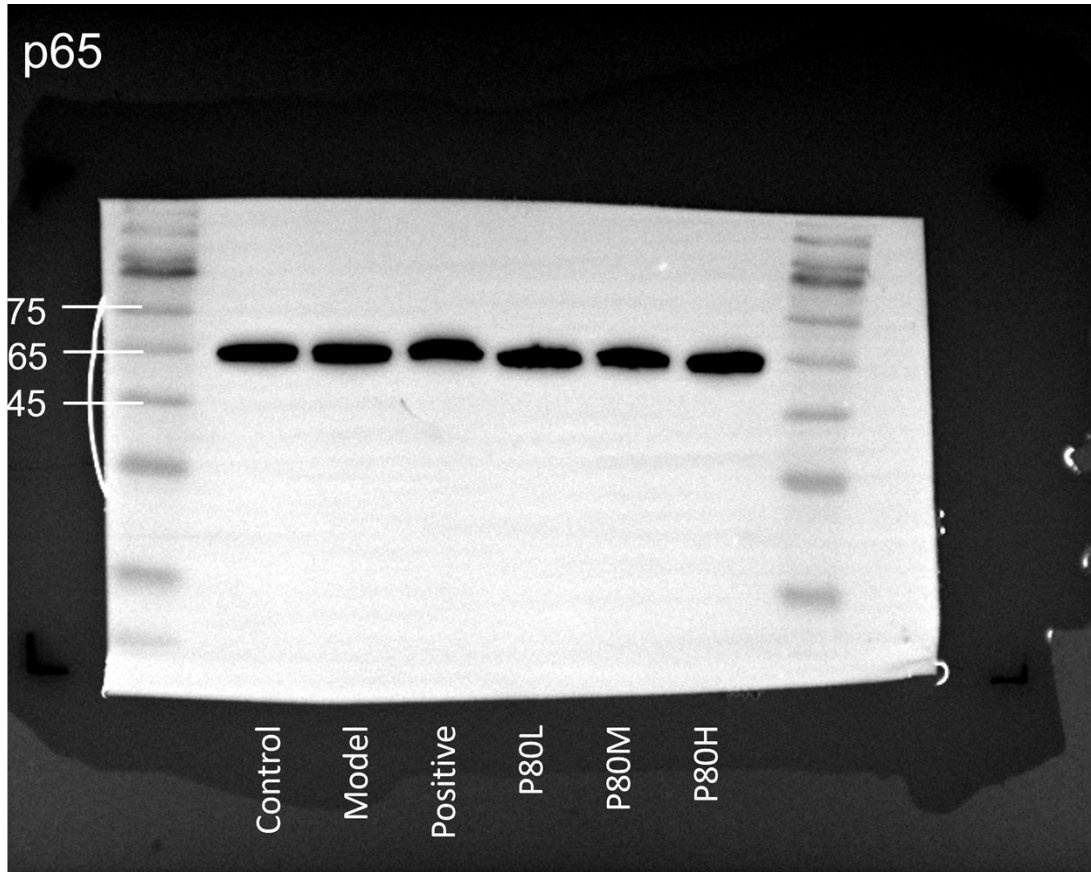

Fig. S5 WB figure of p65 (65 kDa)

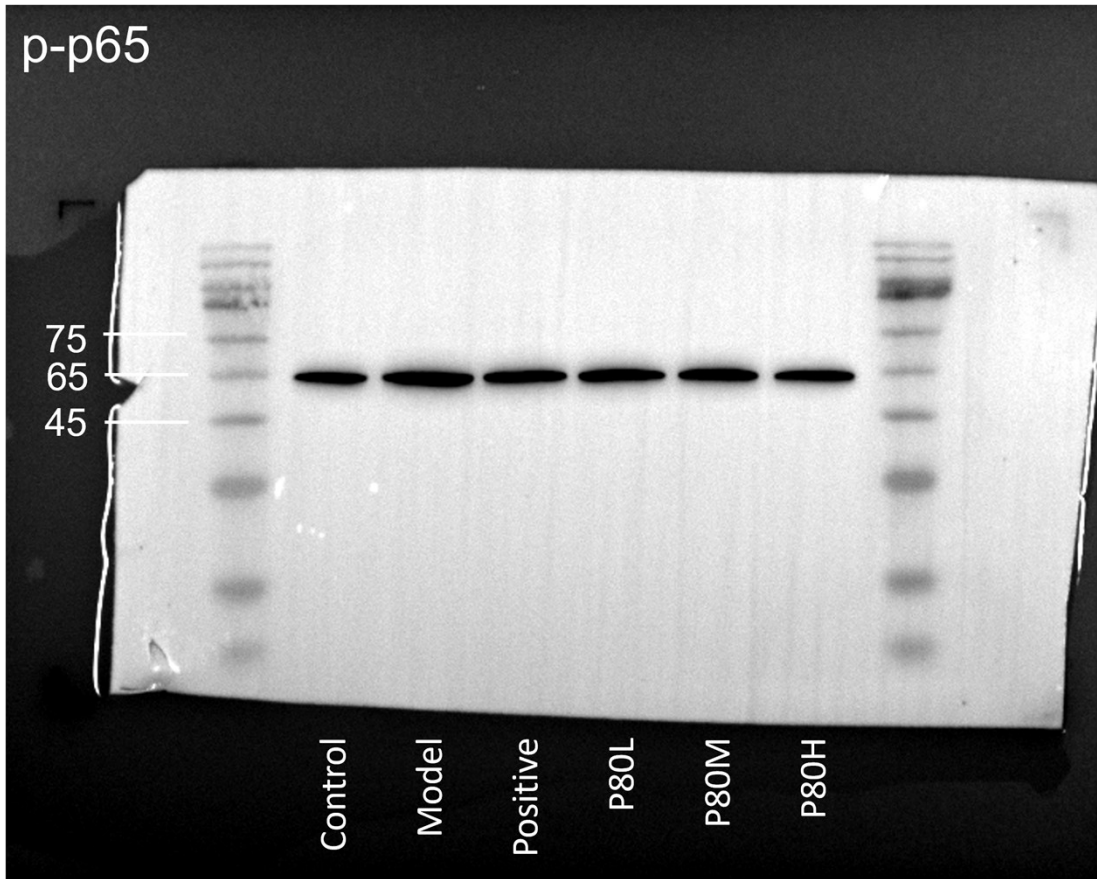

Fig. S6 WB figure of p-p65 (65 kDa)

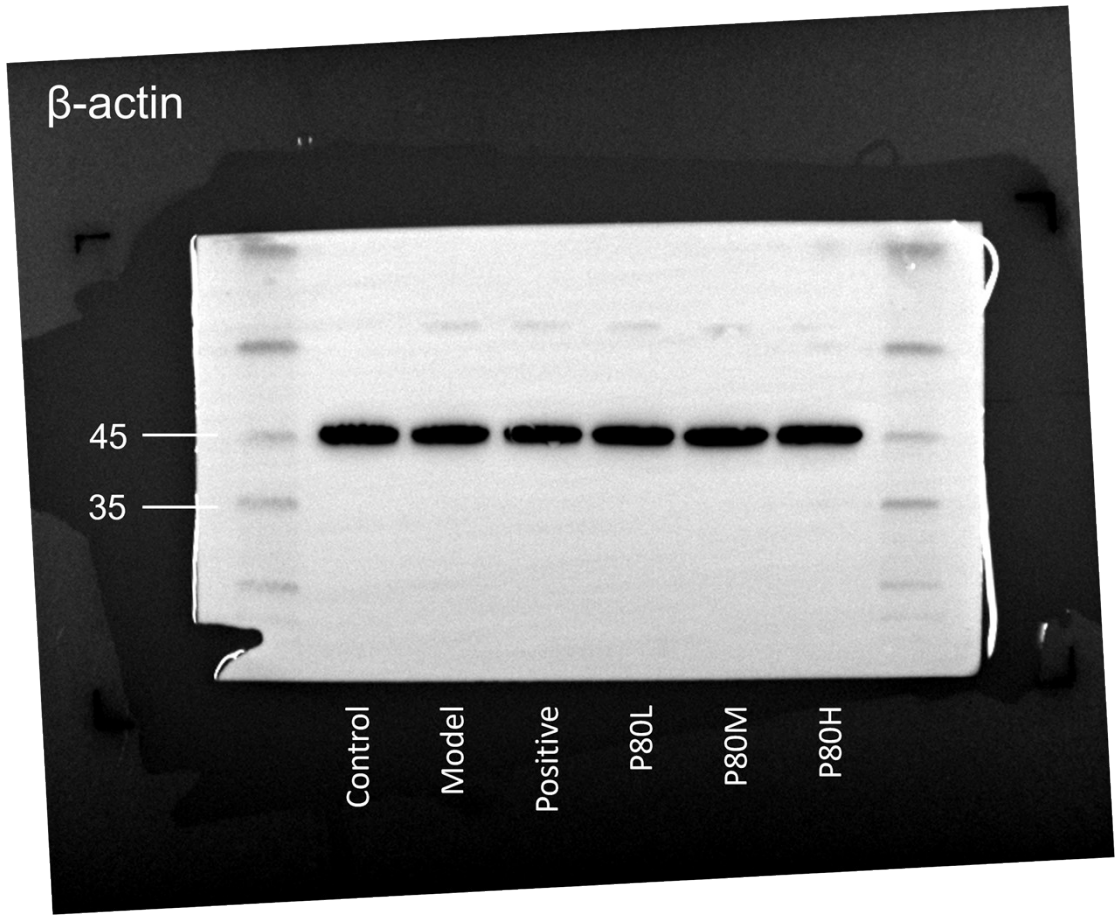

Fig. S7 WB figure of  $\beta$ -actin (42 kDa)

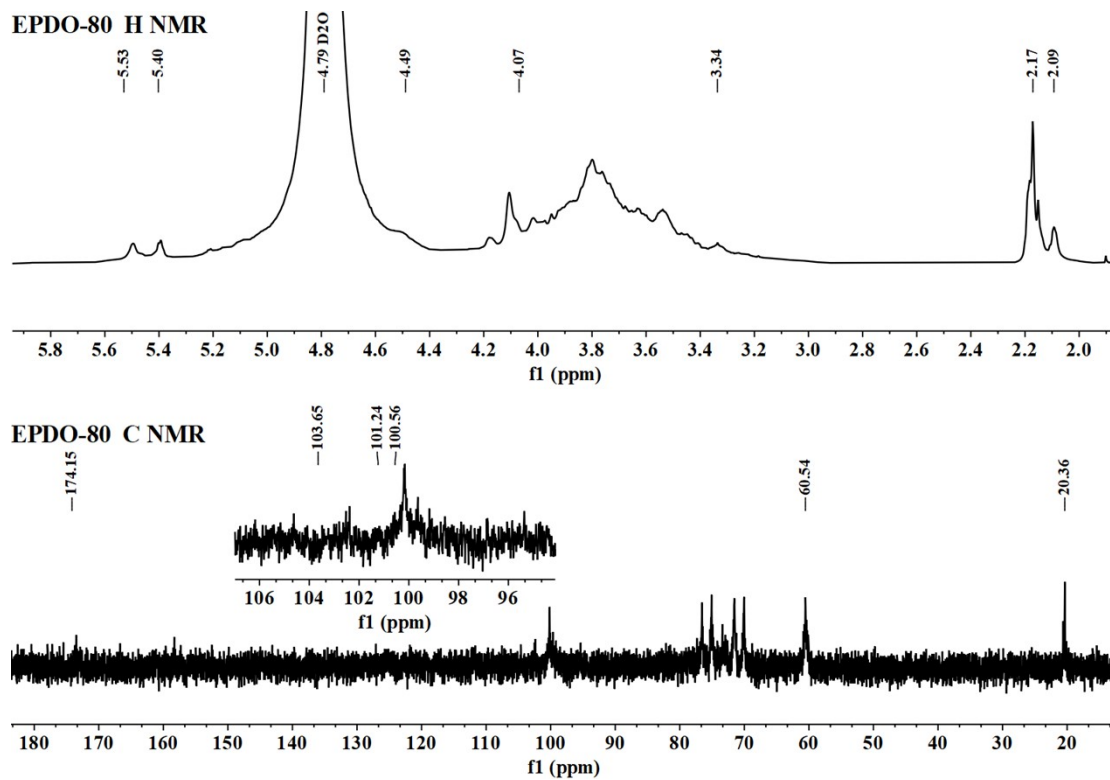

**Fig. S8 1D NMR spectrum of EPDO-80.**



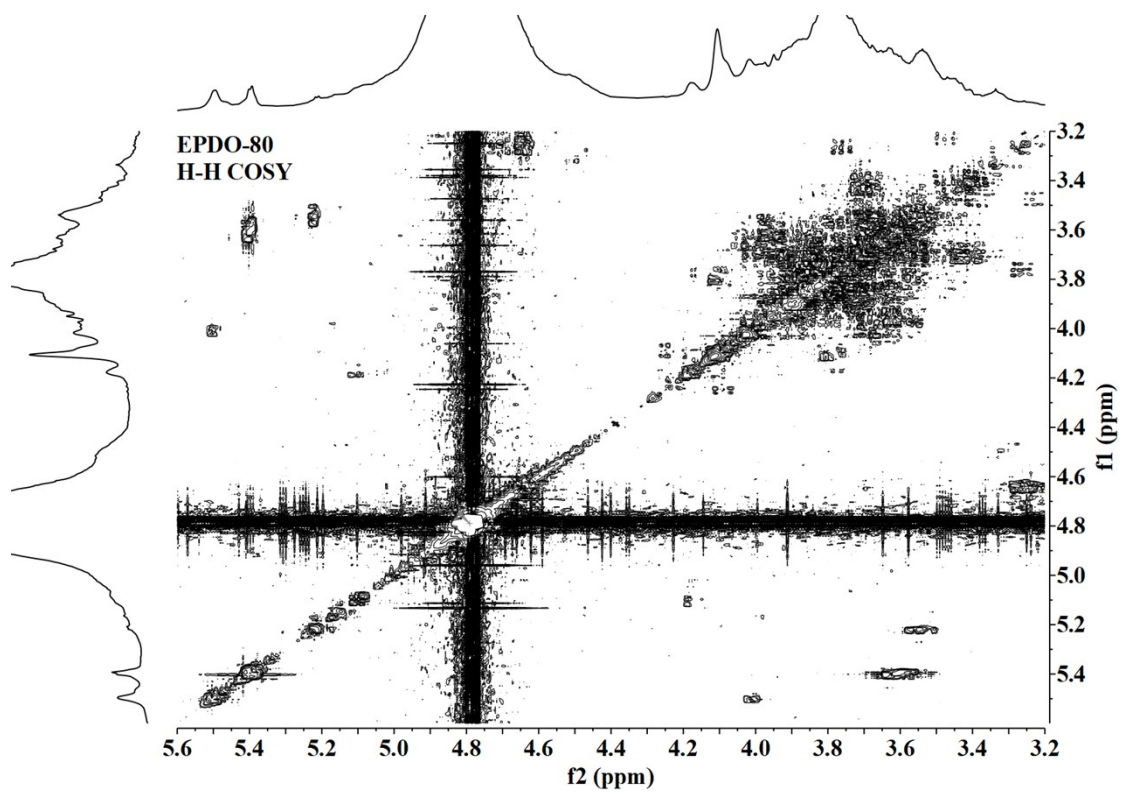

Fig. S9 COSY spectrum of EPDO-80

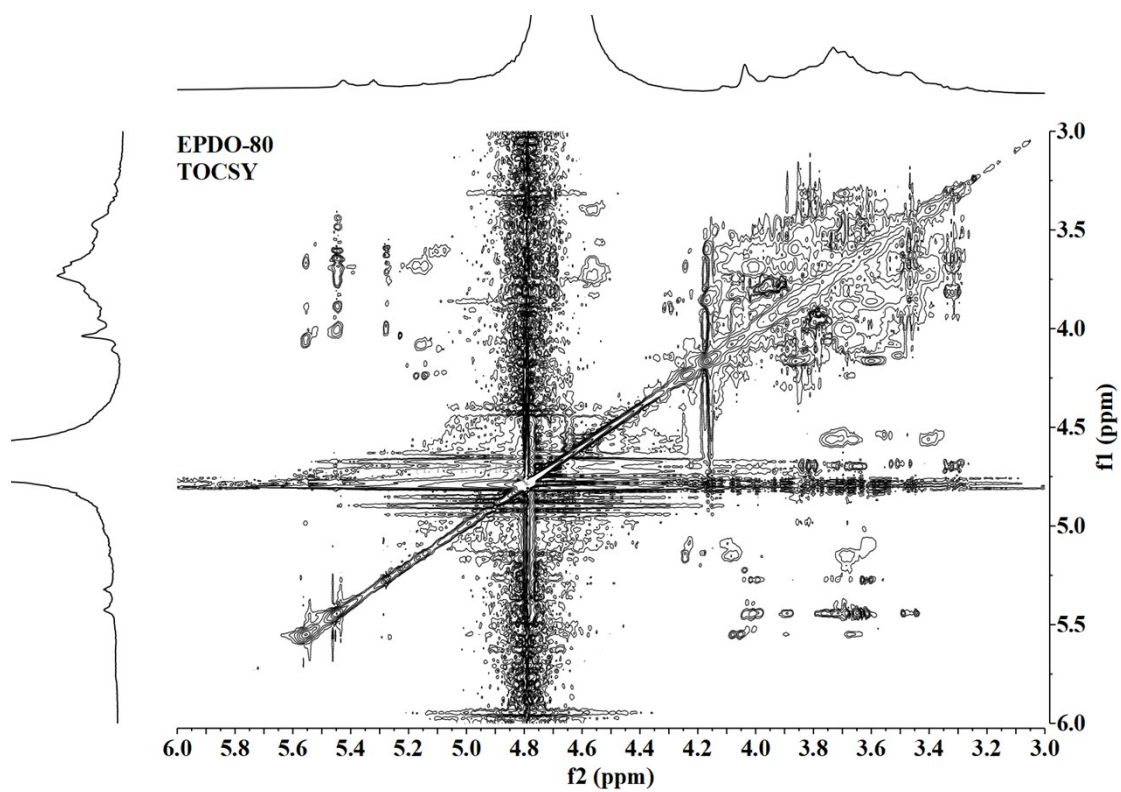

Fig. S10 TOCSY spectrum of EPDO-80

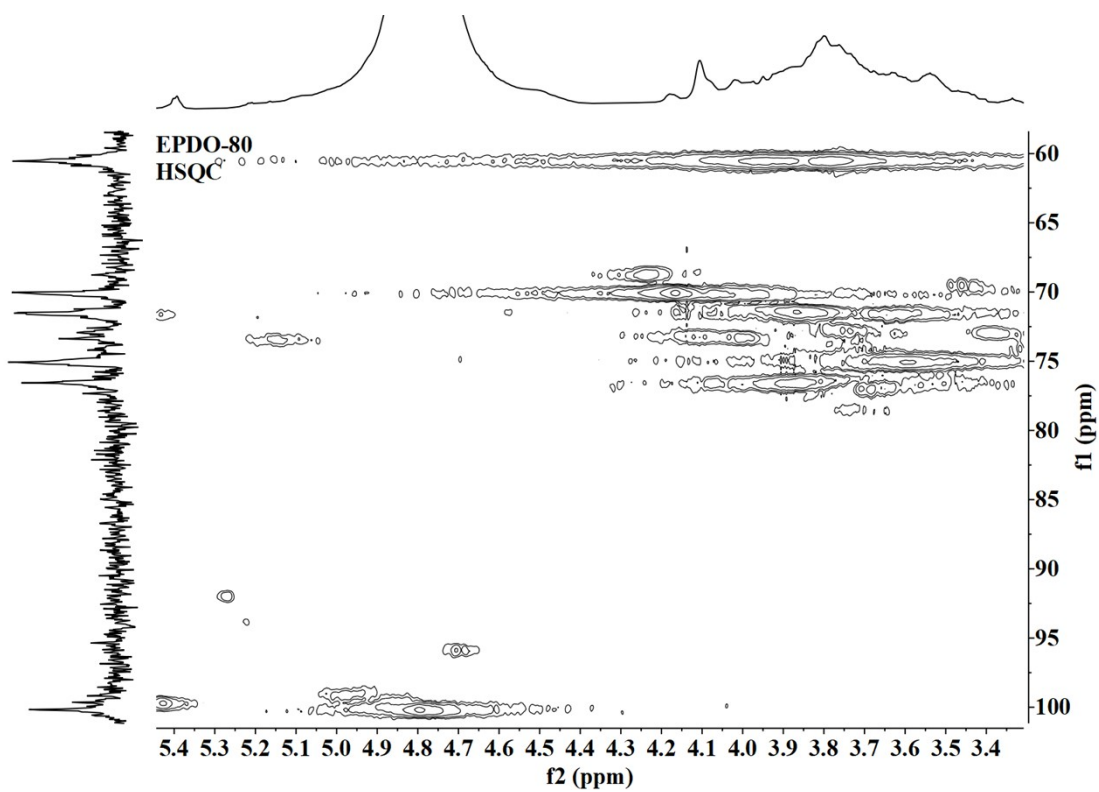

Fig. S11 HSQC spectrum of EPDO-80

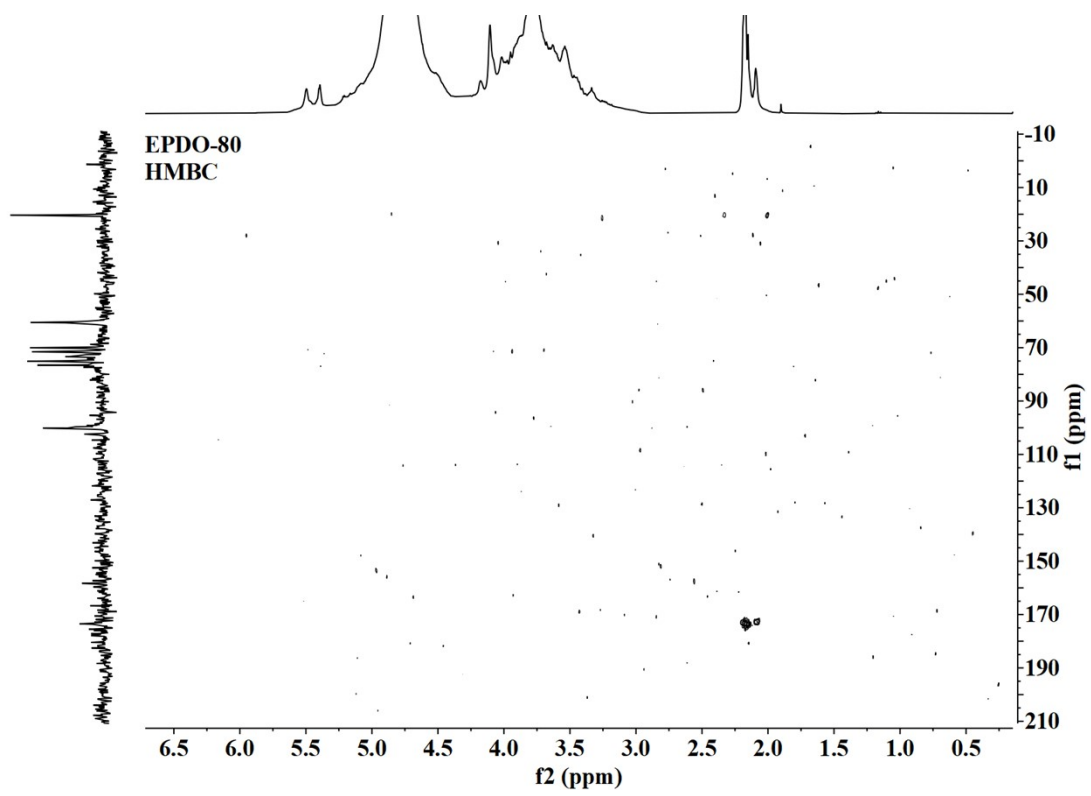

Fig. S12 HMBC spectrum of EPDO-80

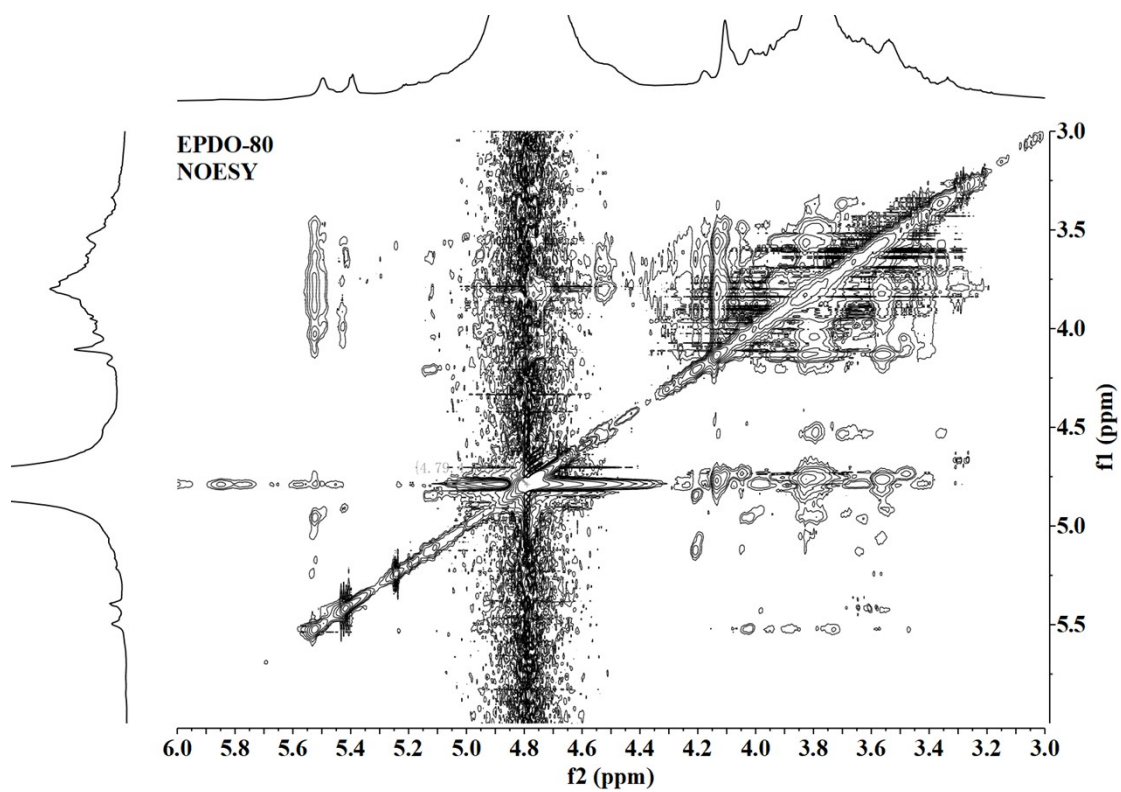

Fig. S13 NOESY spectrum of EPDO-80
